# Supplementary material for: Metamorphic records of multiple seismic cycles during subduction
Source: PubMed Central journal article supplement — Sci Adv. 2018 Mar 21;4(3):eaaq0234. doi: 10.1126/sciadv.aaq0234 (PMC5862461; doi:10.1126/sciadv.aaq0234), 2018-03-21
Supplement: aaq0234_SM.pdf [file aaq0234_SM.pdf]

## Supplementary Materials for **Metamorphic records of multiple seismic cycles during subduction**

Daniel R. Viete, Bradley R. Hacker, Mark B. Allen, Gareth G. E. Seward, Mark J. Tobin,  
Chris S. Kelley, Gianfelice Cinque, Andrew R. Duckworth

Published 21 March 2018, *Sci. Adv.* **4**, eaq0234 (2018)  
DOI: 10.1126/sciadv.aq0234

### **The PDF file includes:**

- fig. S1. Color overlay x-ray count maps for major divalent elements in Garnet 1.1 from CA13-01.
- fig. S2. Color overlay x-ray count maps for major divalent elements in Garnet 1.4 from CA13-01.
- fig. S3. Color overlay x-ray count maps for major divalent elements in Garnet 1.5 from CA13-01.
- fig. S4. Color overlay x-ray count maps for major divalent elements in Garnet 1.6 from CA13-01.
- fig. S5. Color overlay x-ray count maps for major divalent elements in Garnet 2.1 from CA13-01.
- fig. S6. Color overlay x-ray count maps for major divalent elements in Garnet 2.2 from CA13-01.
- fig. S7. Color overlay x-ray count maps for major divalent elements in Garnet 2.3 from CA13-01.
- fig. S8. Color overlay x-ray count maps for major divalent elements in Garnet 1.2 from CA13-05A.
- fig. S9. Color overlay x-ray count maps for major divalent elements in Garnet 1.4 from CA13-05A.
- fig. S10. Color overlay x-ray count maps for major divalent elements in Garnet 1.7 from CA13-05A.
- fig. S11. Color overlay x-ray count maps for major divalent elements in Garnet 1.8 from CA13-05A.
- fig. S12. Color overlay x-ray count maps for major divalent elements in Garnet 2.1 from CA13-05A.

- fig. S13. Color overlay x-ray count maps for major divalent elements in Garnet 2.2 from CA13-05A.
- fig. S14. Color overlay x-ray count maps for Mg in garnets from CA13-01 and CA13-05A.
- fig. S15. Color overlay x-ray count maps for Mn in garnets from CA13-01 and CA13-05A.
- fig. S16. Blowups of regions indicated by white rectangles in (top row) fig. S14 and (bottom row) fig. S15.
- References (71–83)

**Other Supplementary Material for this manuscript includes the following:**

(available at [advances.sciencemag.org/cgi/content/full/4/3/eaag0234/DC1](https://advances.sciencemag.org/cgi/content/full/4/3/eaag0234/DC1))

- Excel file

Color-enhanced wavelength-dispersive spectrometer x-ray count maps for Al, Ca, Fe, Mg and Mn in all garnets analyzed from Ring Mountain. Decreasing element content is indicated by yellow–green–blue–black color progression.

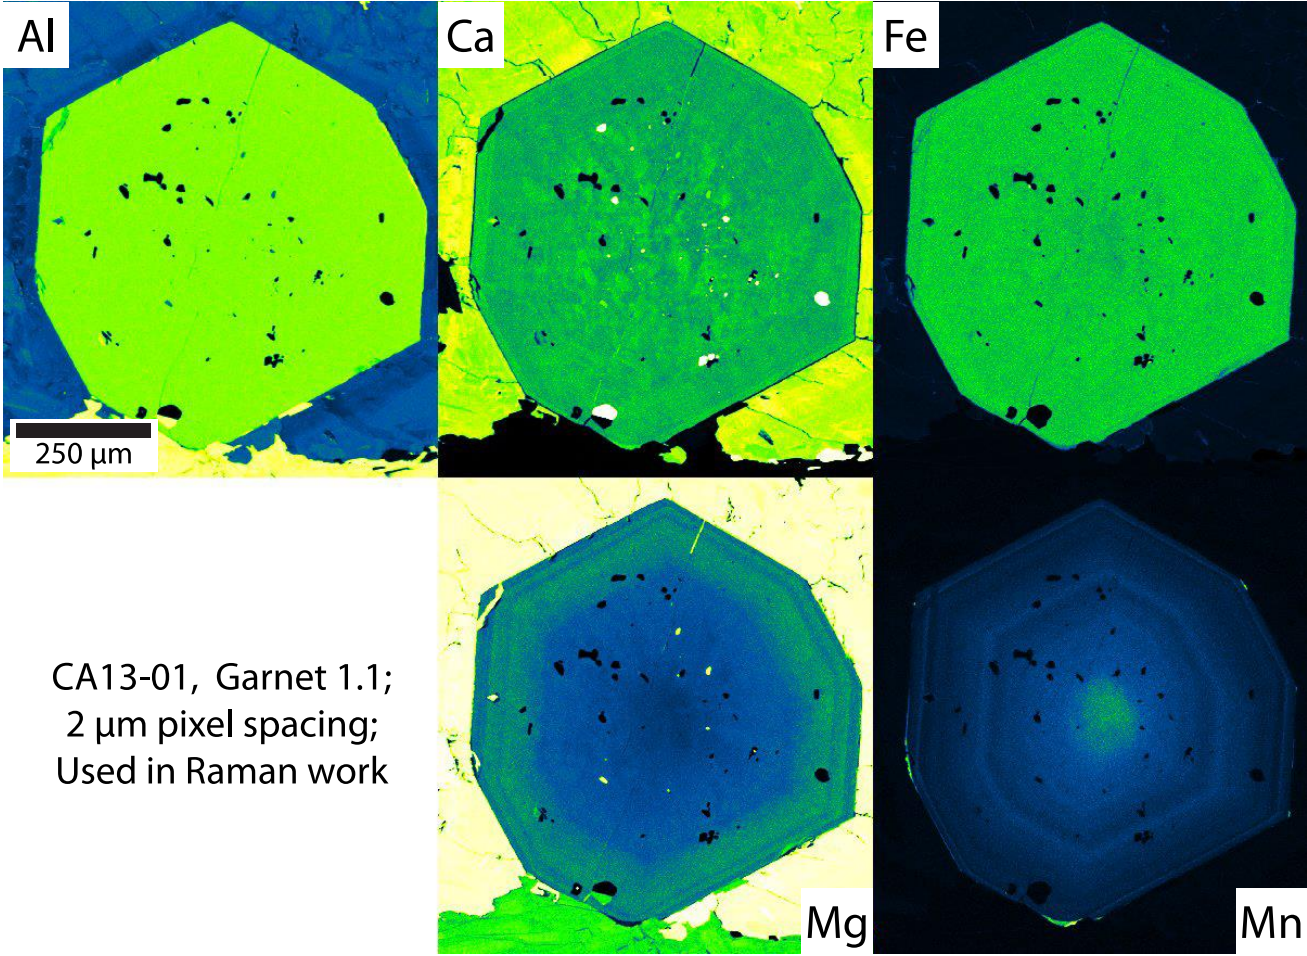

**fig. S1. Color overlay x-ray count maps for major divalent elements in Garnet 1.1 from CA13-01.**

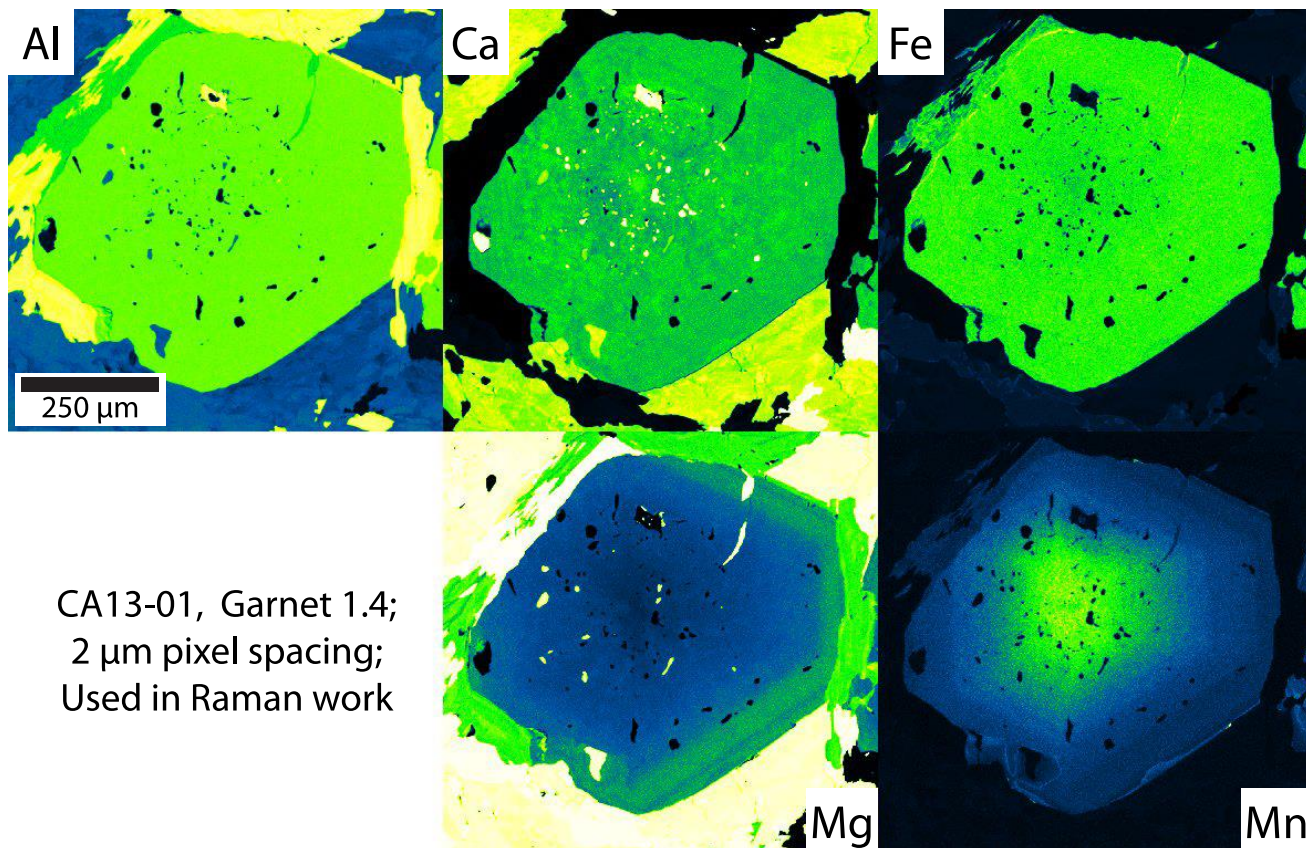

**fig. S2. Color overlay x-ray count maps for major divalent elements in Garnet 1.4 from CA13-01.**

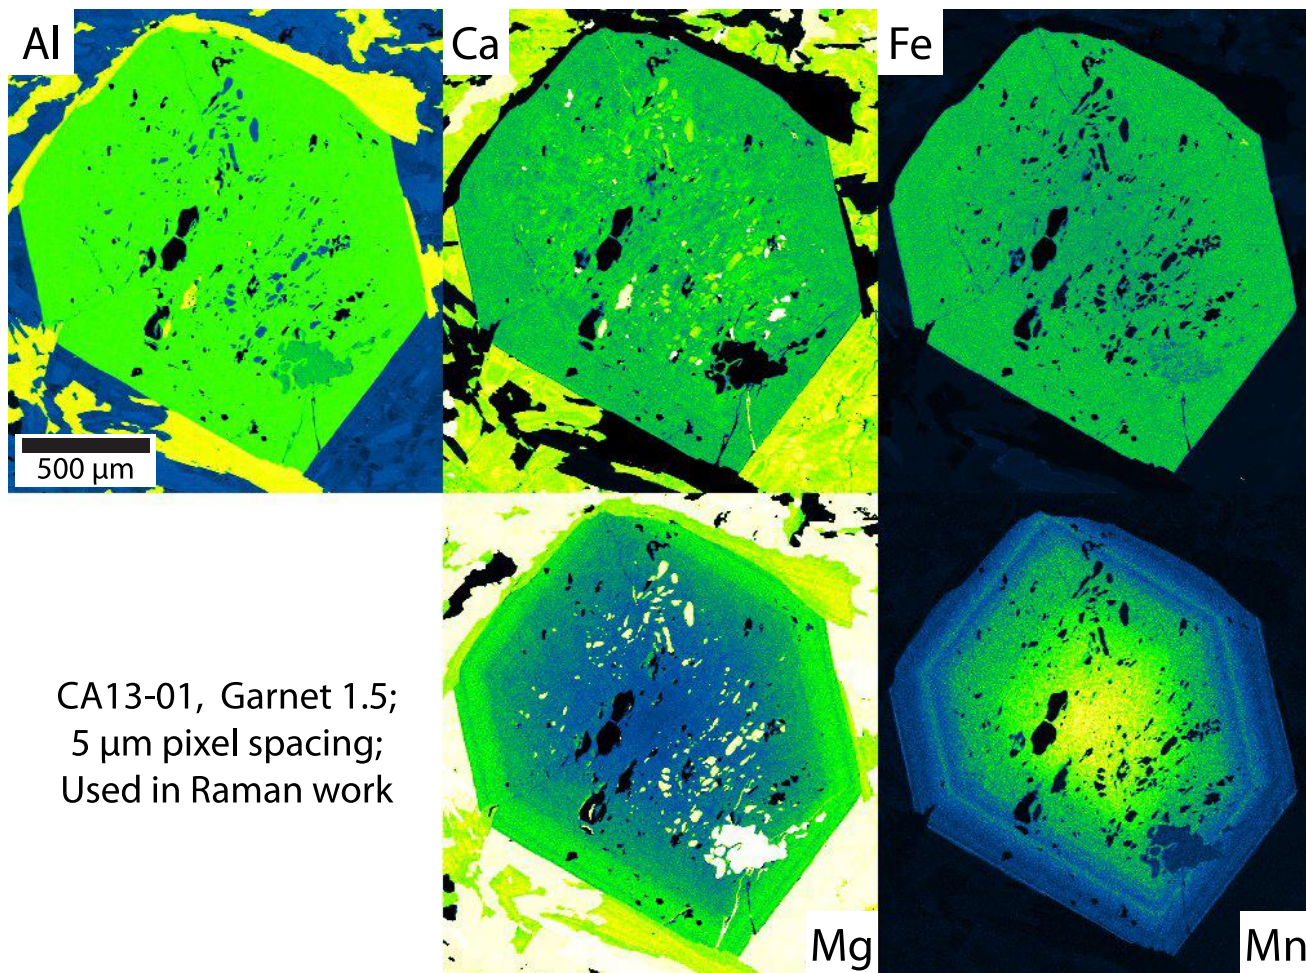

**fig. S3. Color overlay x-ray count maps for major divalent elements in Garnet 1.5 from CA13-01.**

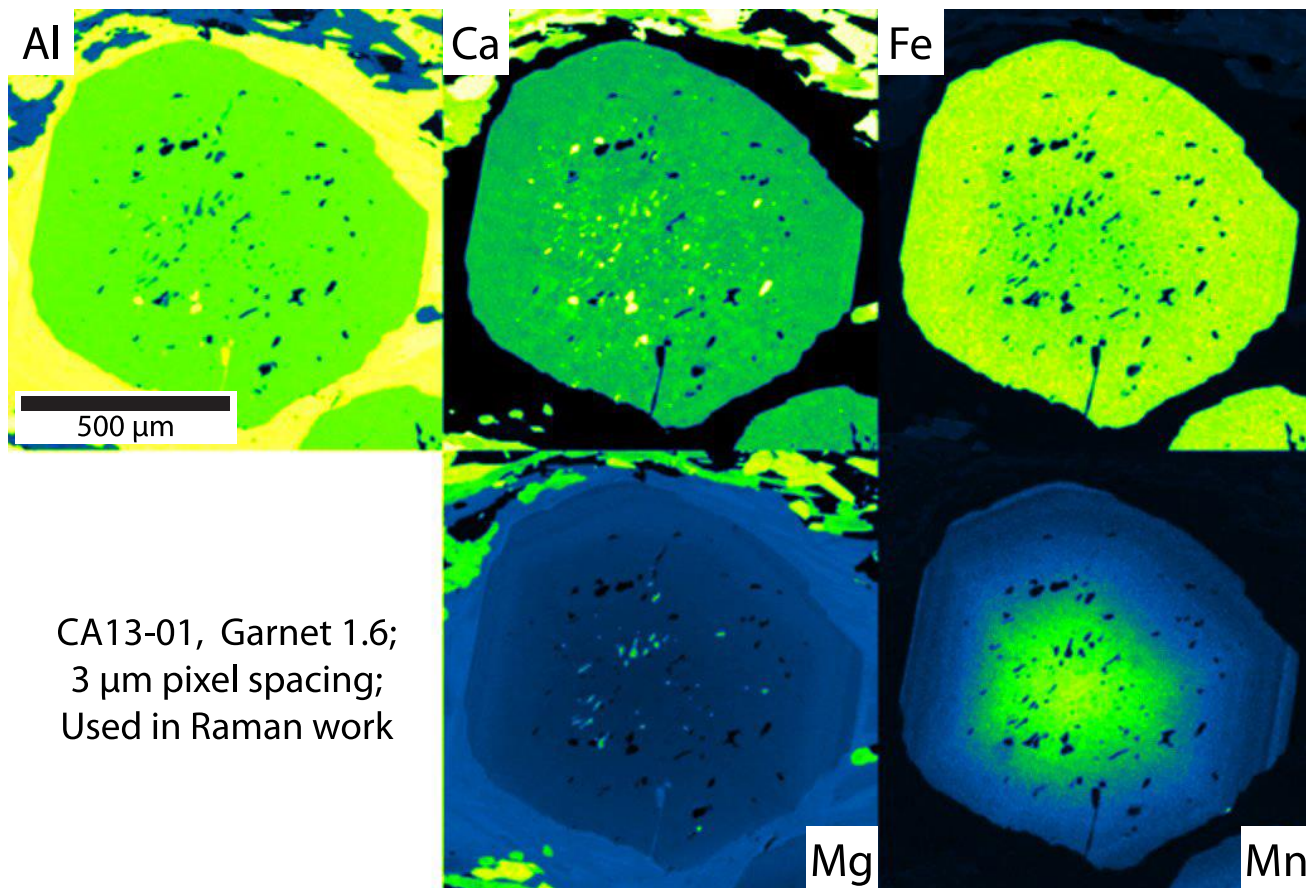

**fig. S4. Color overlay x-ray count maps for major divalent elements in Garnet 1.6 from CA13-01.**

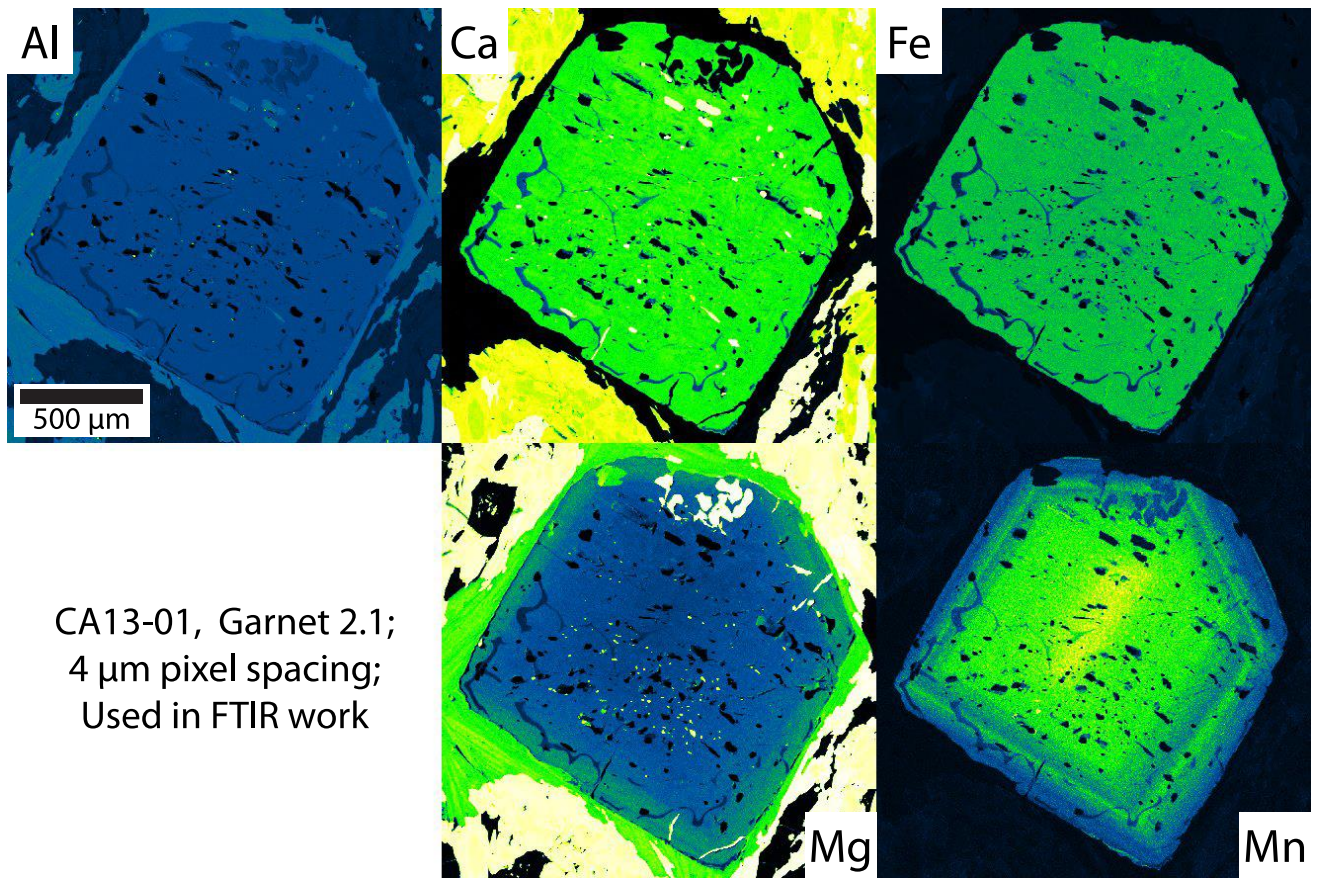

**fig. S5. Color overlay x-ray count maps for major divalent elements in Garnet 2.1 from CA13-01.**

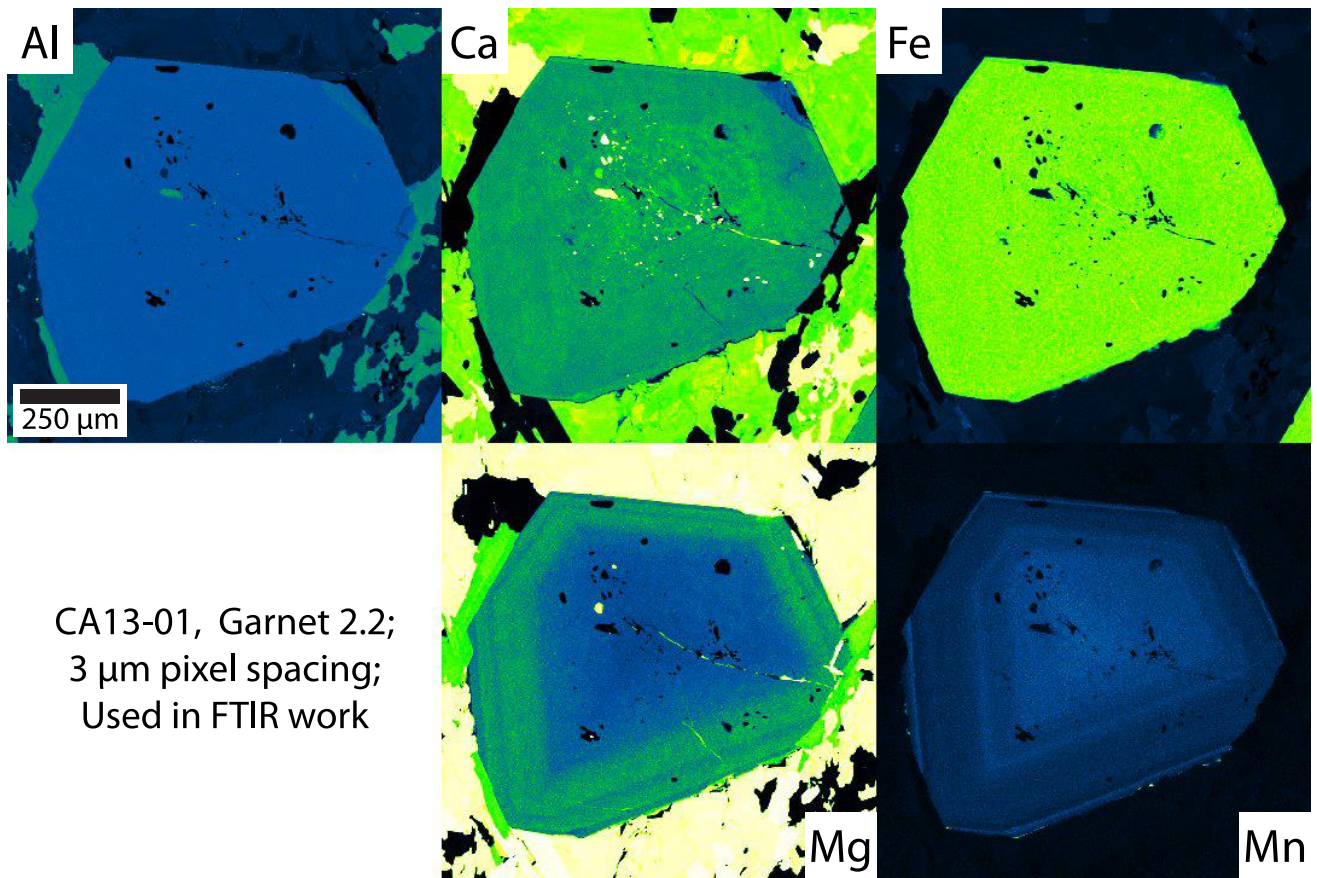

**fig. S6. Color overlay x-ray count maps for major divalent elements in Garnet 2.2 from CA13-01.**



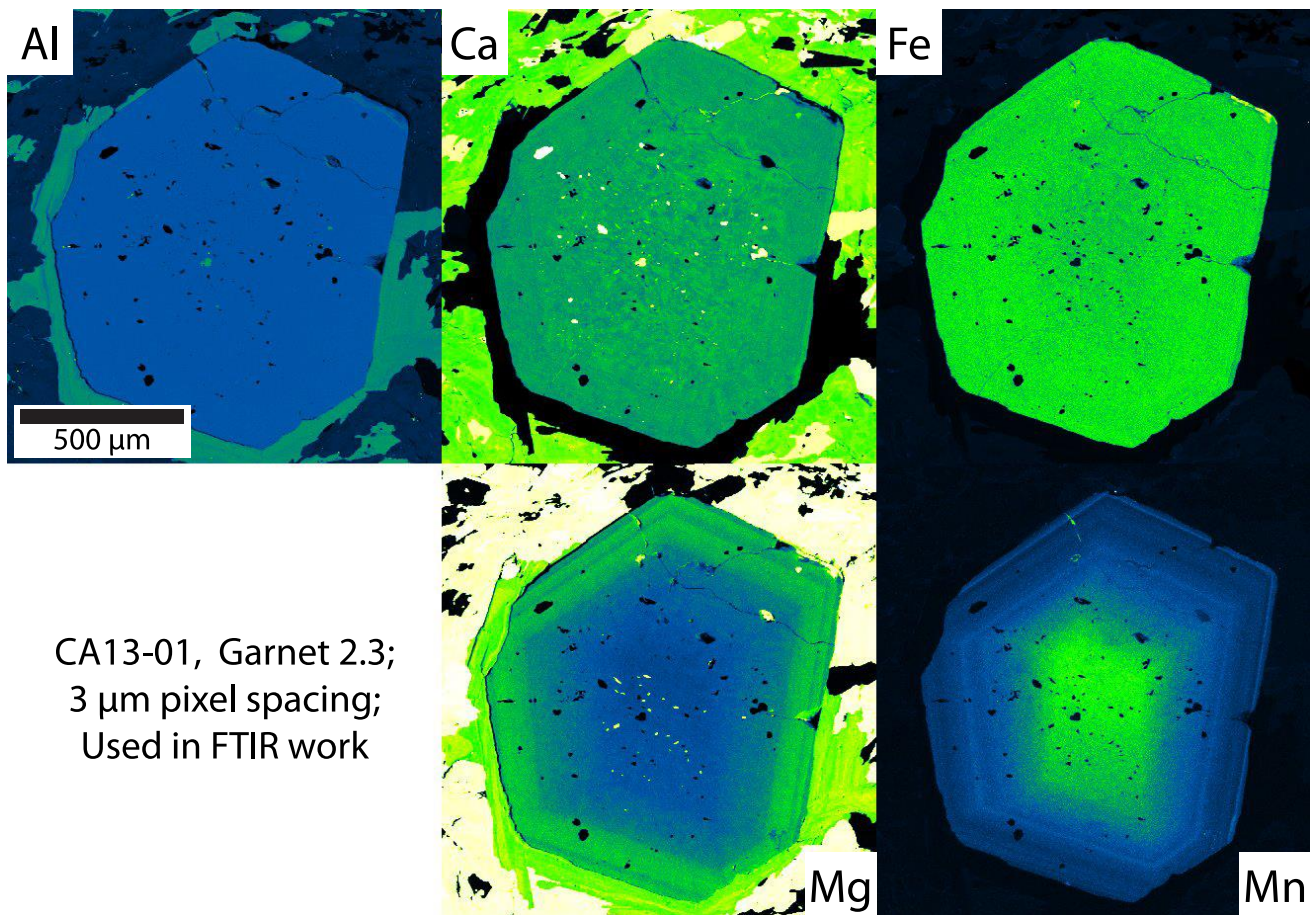

**fig. S7. Color overlay x-ray count maps for major divalent elements in Garnet 2.3 from CA13-01.**

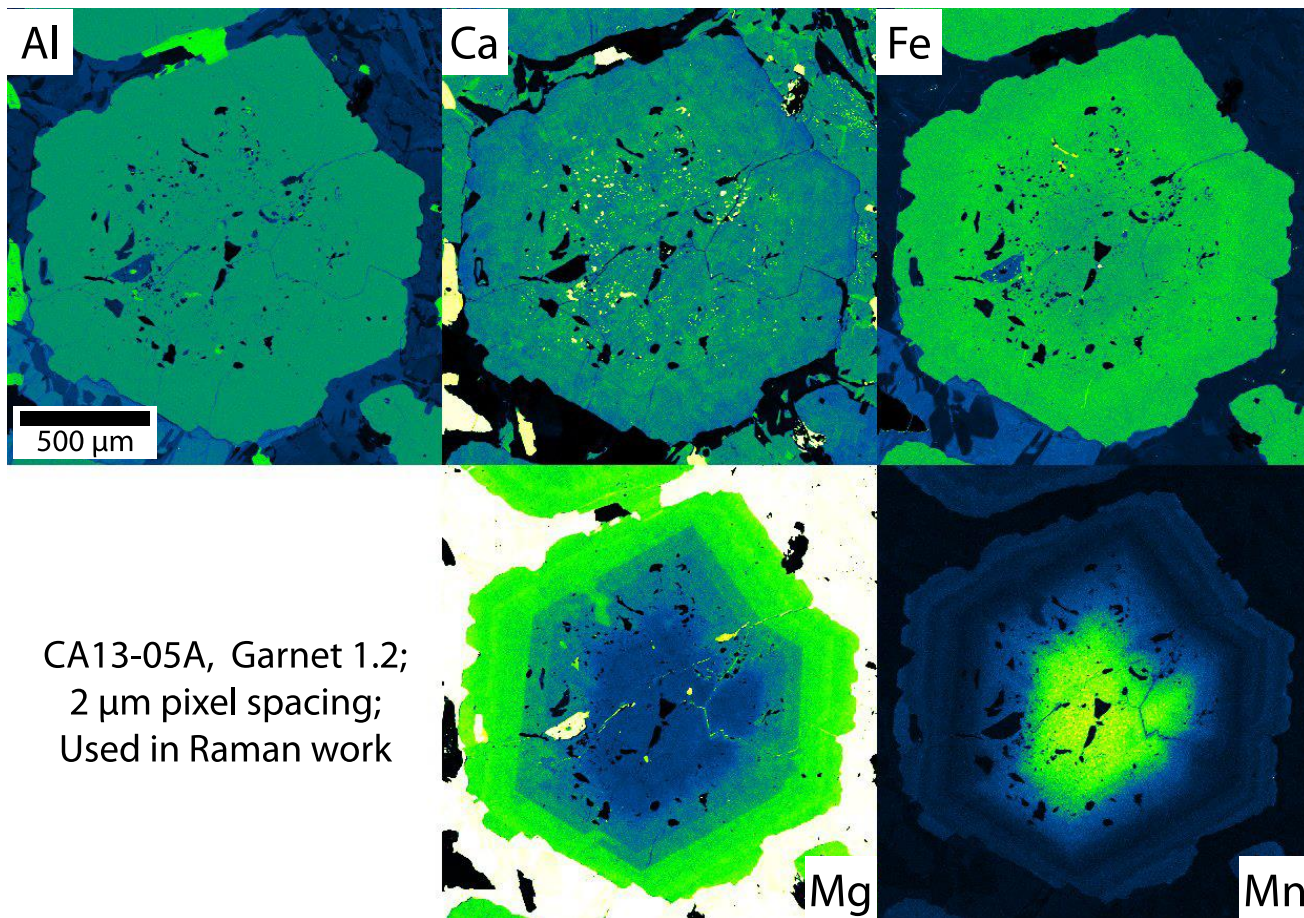

**fig. S8. Color overlay x-ray count maps for major divalent elements in Garnet 1.2 from CA13-05A.**

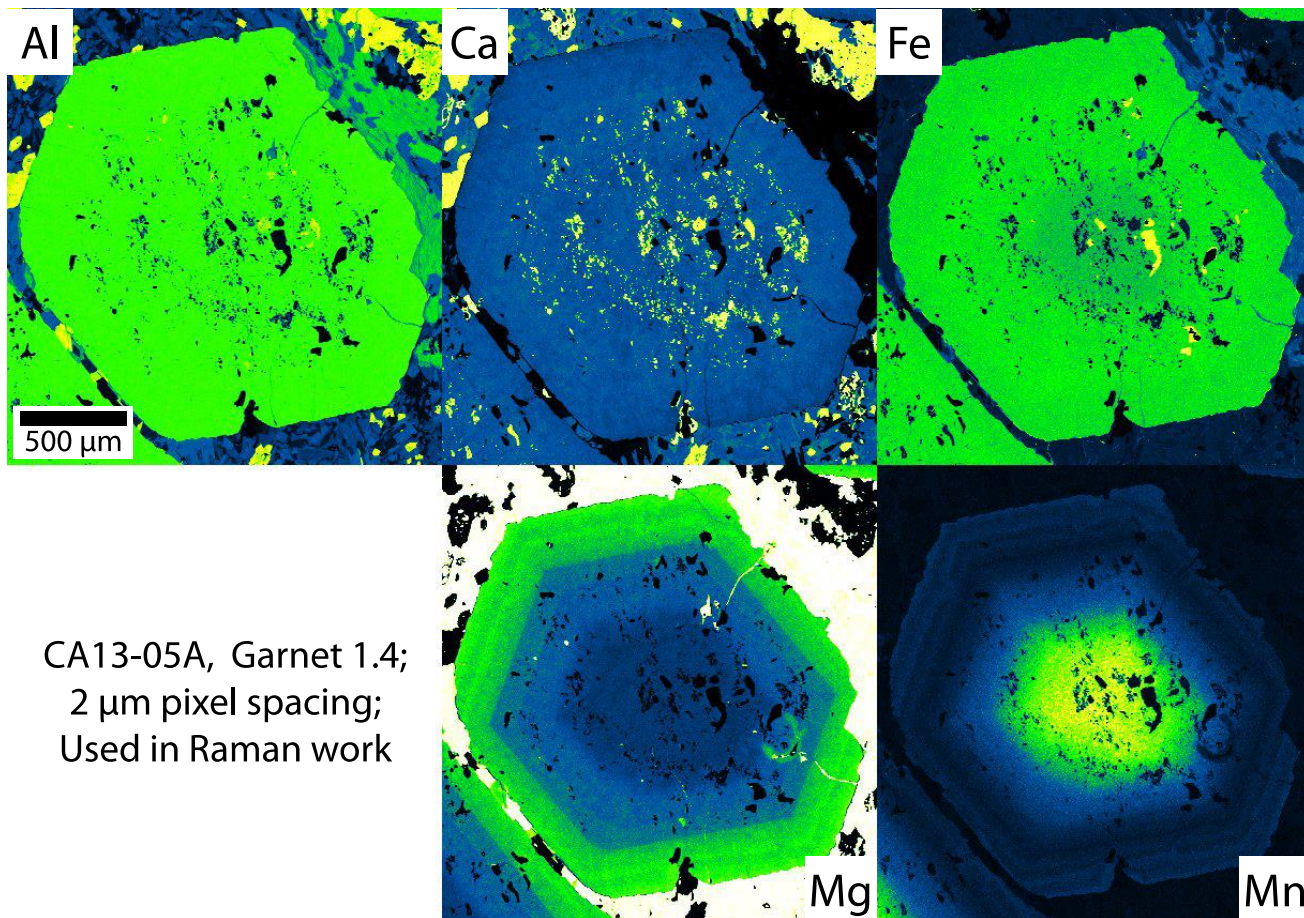

CA13-05A, Garnet 1.4;  
2 μm pixel spacing;  
Used in Raman work

**fig. S9. Color overlay x-ray count maps for major divalent elements in Garnet 1.4 from CA13-05A.**

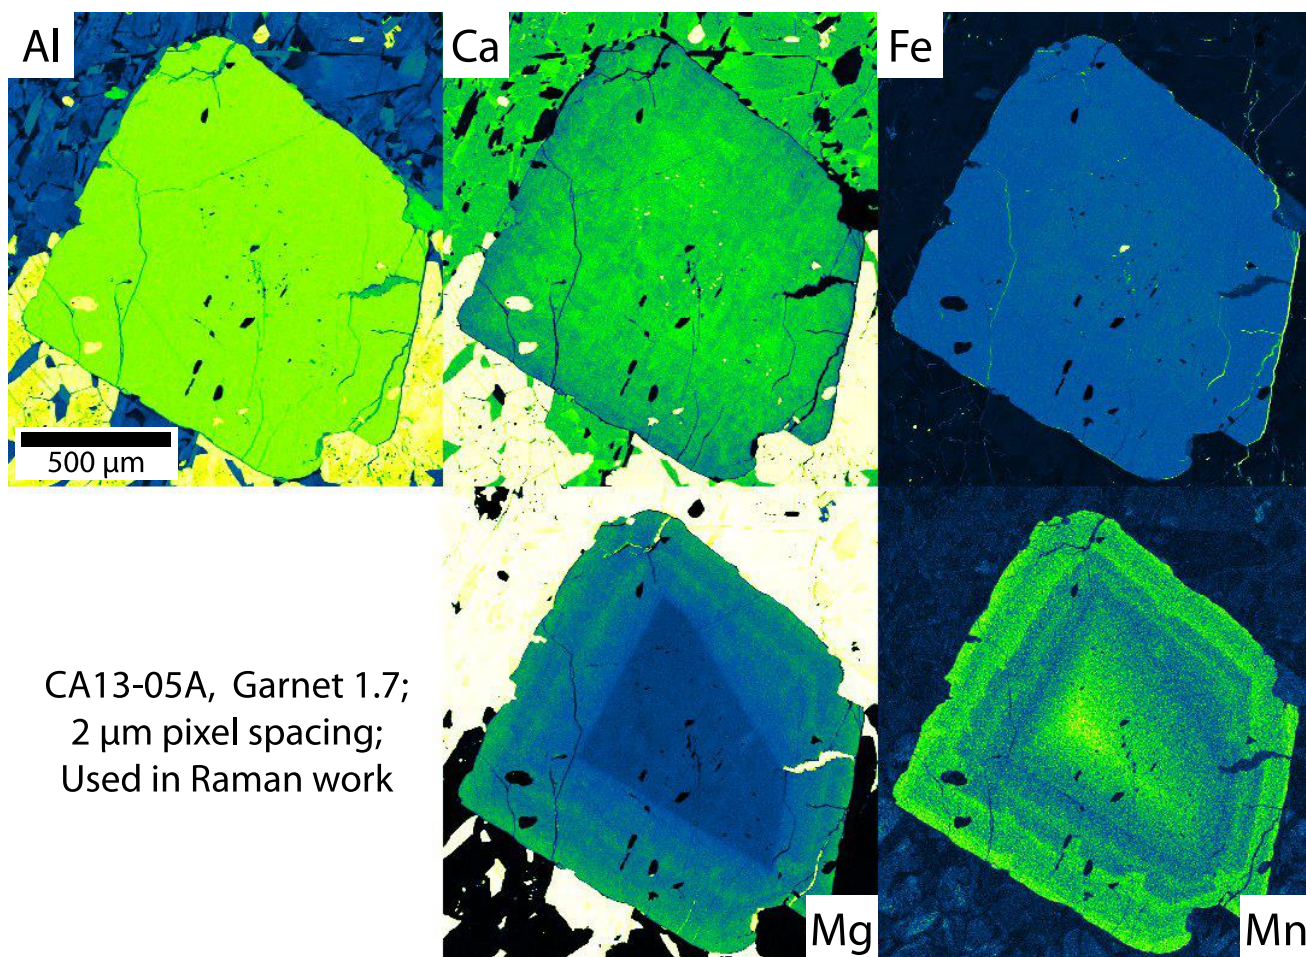

CA13-05A, Garnet 1.7;  
2 μm pixel spacing;  
Used in Raman work

**fig. S10. Color overlay x-ray count maps for major divalent elements in Garnet 1.7 from CA13-05A.**

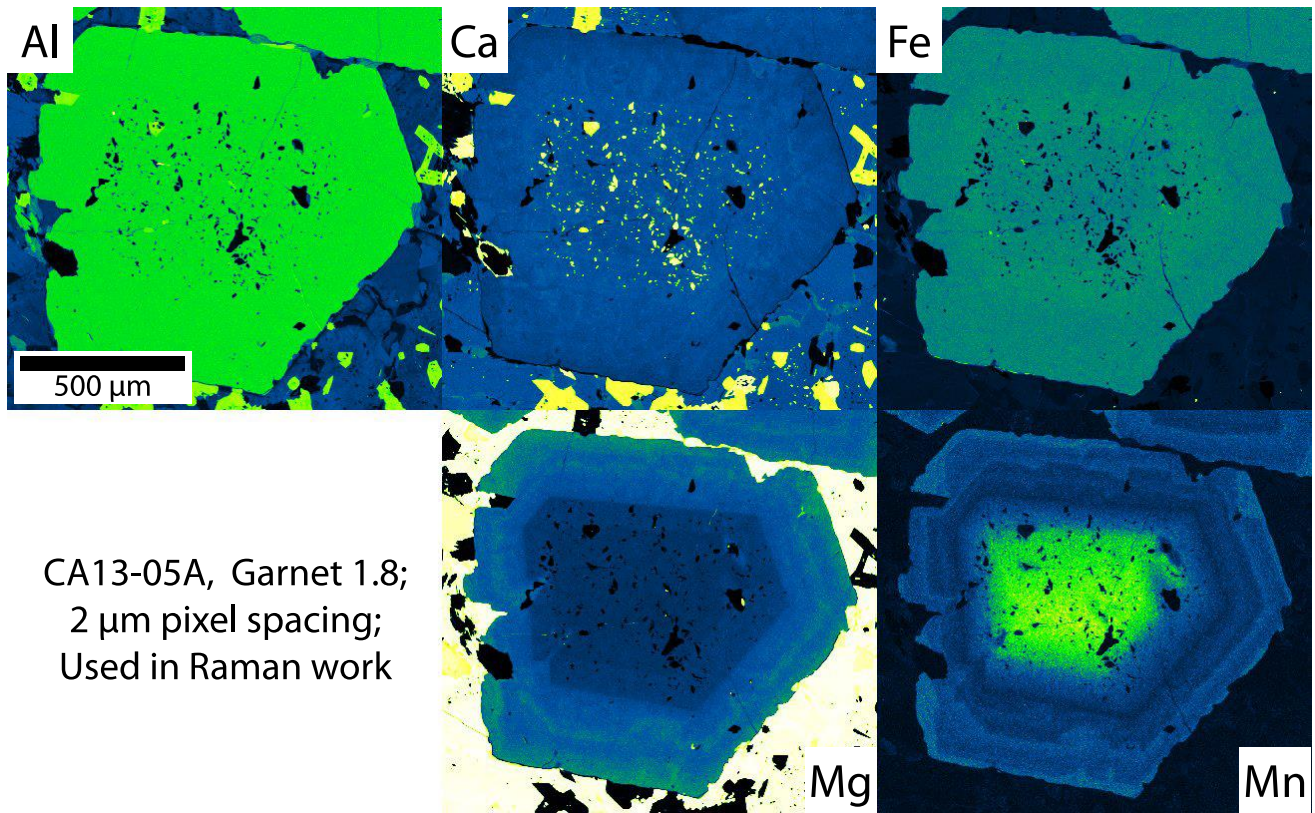

**fig. S11. Color overlay x-ray count maps for major divalent elements in Garnet 1.8 from CA13-05A.**

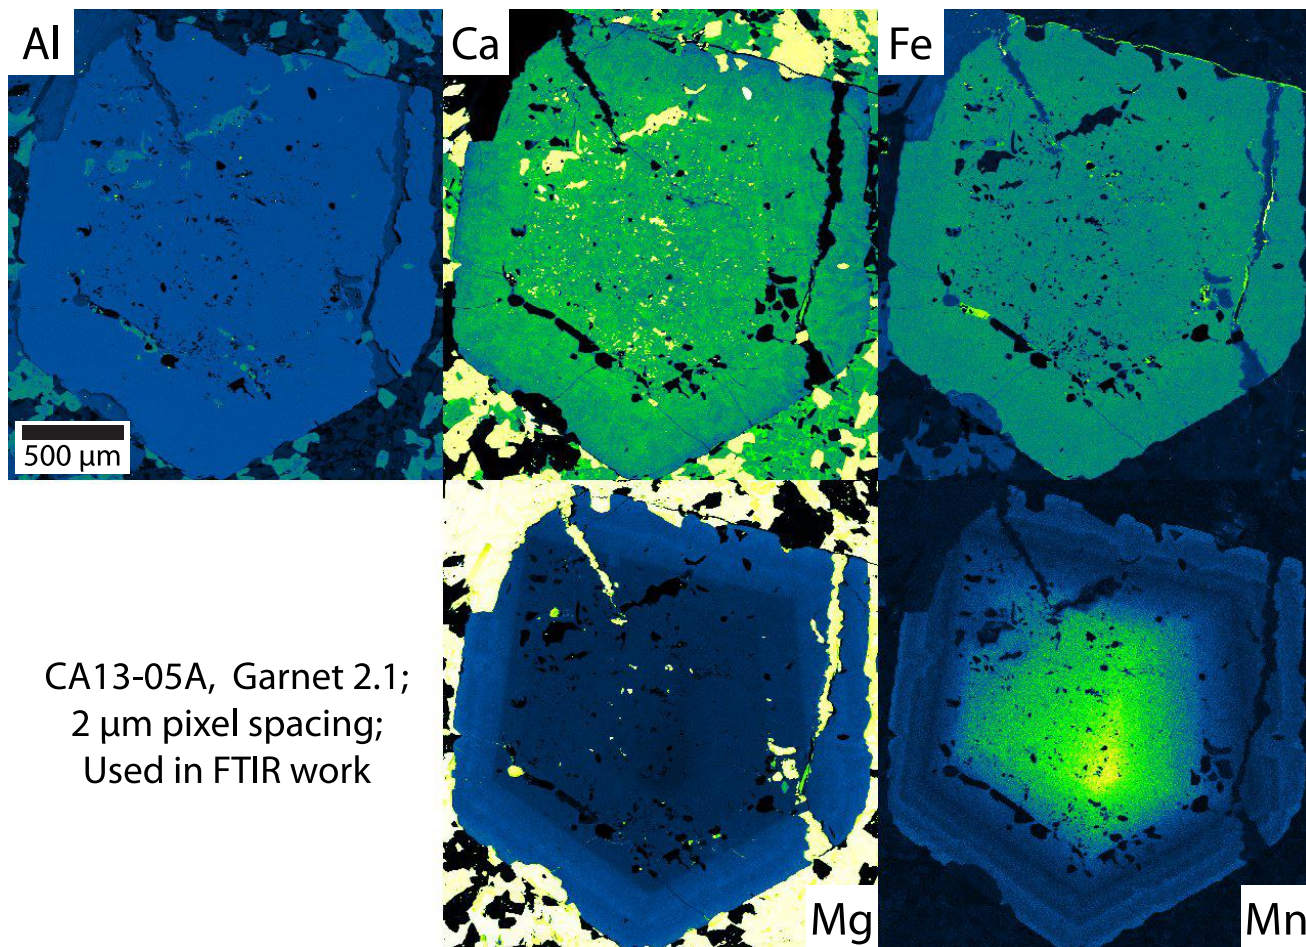

**fig. S12. Color overlay x-ray count maps for major divalent elements in Garnet 2.1 from CA13-05A.**

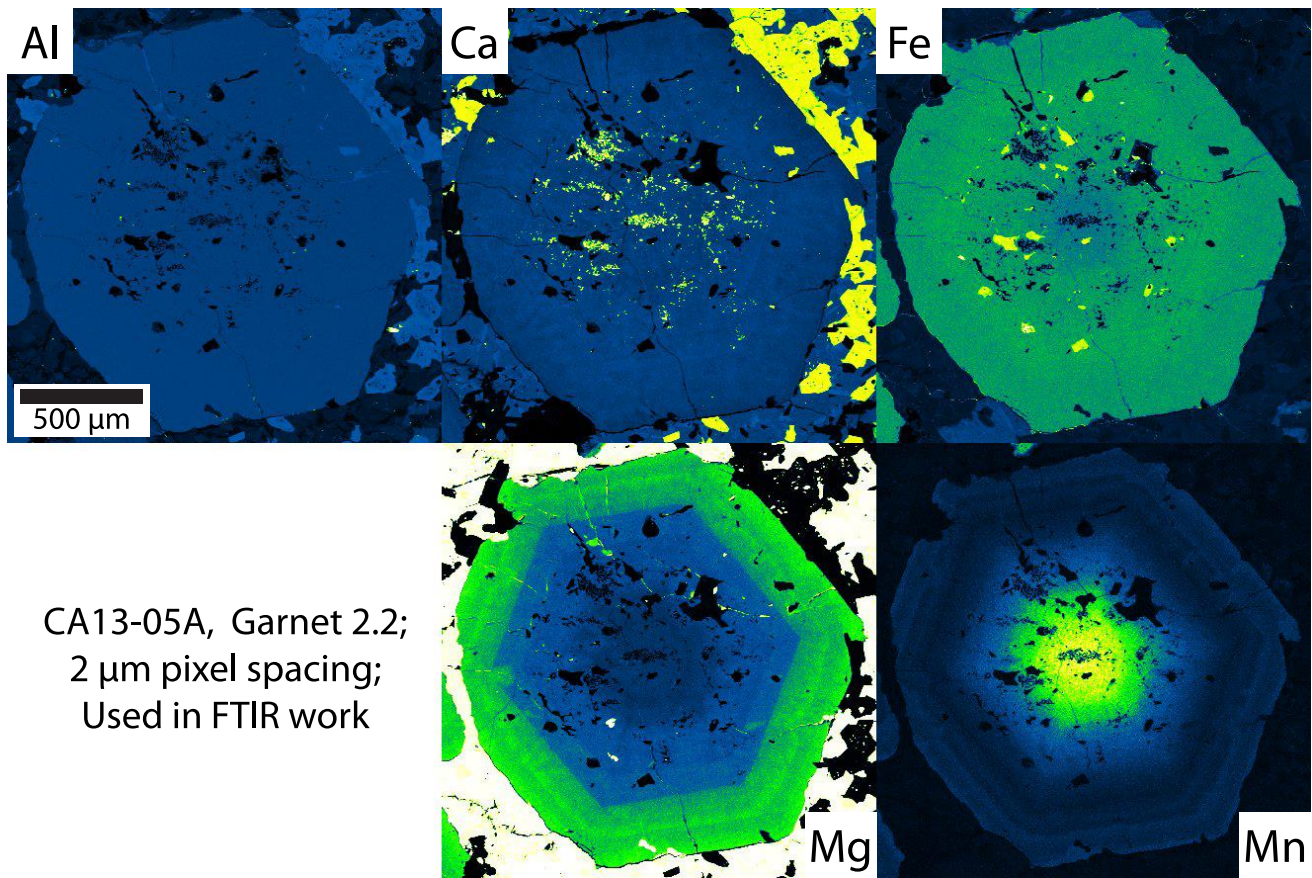

**fig. S13. Color overlay x-ray count maps for major divalent elements in Garnet 2.2 from CA13-05A.**

Color-enhanced wavelength-dispersive spectrometer x-ray count maps for Mg and Mn in garnets from Ring Mountain. Decreasing Mg/Mn content are indicated by yellow–green–blue–black color progression. Spots give location of Raman quartz analyses and are colored according to peak position ( $\pm 1.5 \text{ cm}^{-1}$  about  $470.9 \text{ cm}^{-1}$  for CA13- 01;  $\pm 1.5 \text{ cm}^{-1}$  about  $470.2 \text{ cm}^{-1}$  for CA13-05A; see data in manuscript Fig. 3d). Spot size indicated is much larger than actual  $1 \mu\text{m}$  spot.

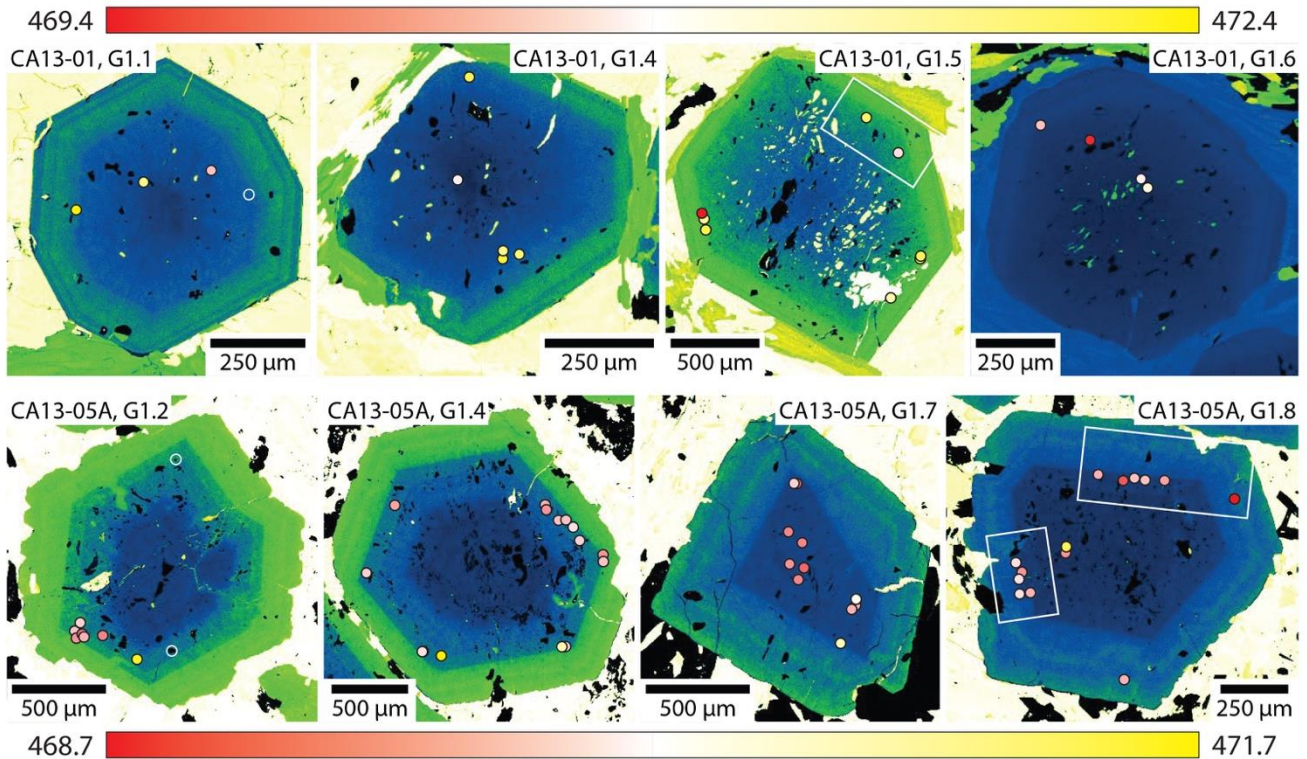

**fig. S14.** Color overlay x-ray count maps for Mg in garnets from CA13-01 and CA13-05A.



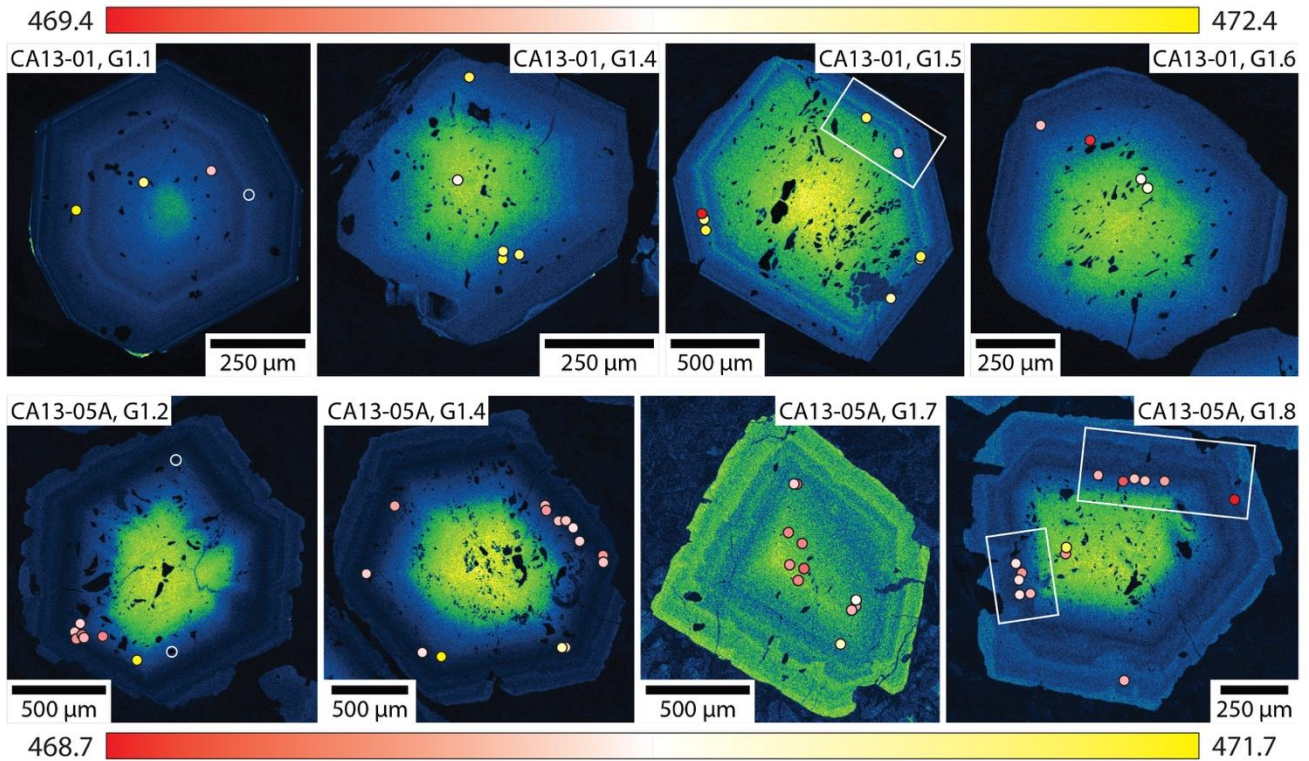

**fig. S15. Color overlay x-ray count maps for Mn in garnets from CA13-01 and CA13-05A.**

Blow-ups of white rectangles in the figures on the previous page, showing notable zones with varying Raman response linked to compositional zoning boundaries.

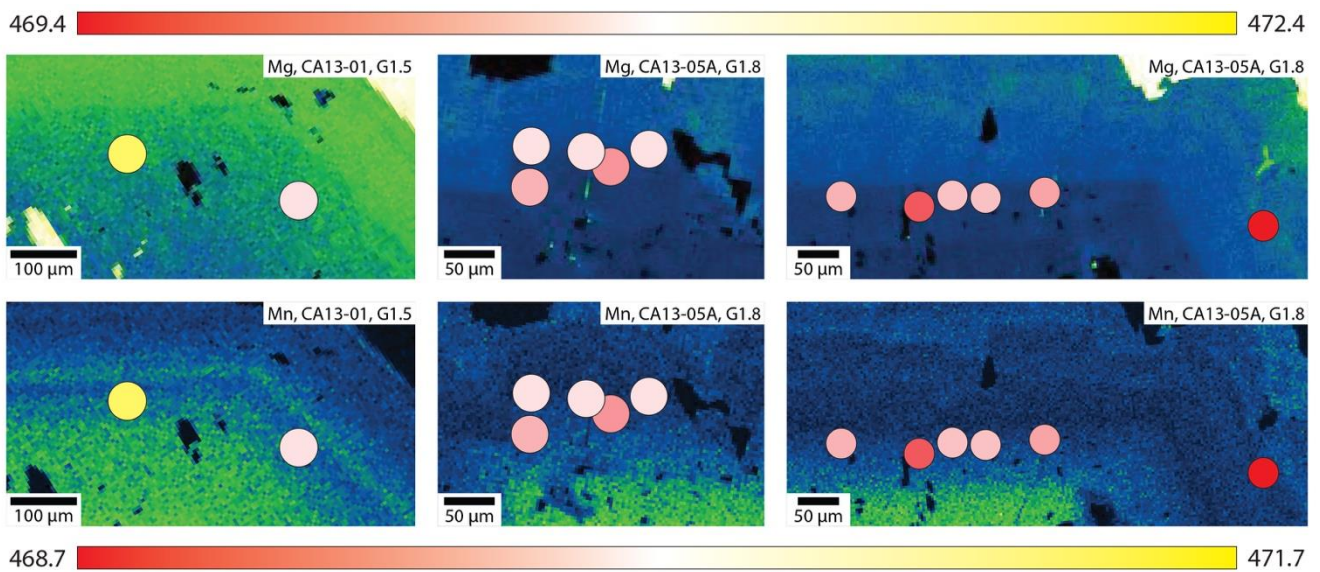

**fig. S16. Blowups of regions indicated by white rectangles in (top row) fig. S14 and (bottom row) fig. S15.**

Solution models that were used for the modeling Perple\_X modeling of metamorphic phase equilibria are as follows...

|               |          |
|---------------|----------|
| Amphibole     | (71, 72) |
| Biotite       | (73, 74) |
| Chlorite      | (75)     |
| Clinopyroxene | (76, 77) |
| Feldspar      | (78)     |
| Fluid         | (79)     |
| Garnet        | (74)     |
| Ilmenite      | (74)     |
| Melt          | (80, 81) |
| White mica    | (82, 83) |
